# Supplementary material for: Alteration of somatostatin receptor 2 expression in canine mammary gland tumor
Source: PubMed Central journal article supplement — J Vet Med Sci. 2015 May 18;77(10):1319–22. doi: 10.1292/jvms.15-0002 (PMC4638304; doi:10.1292/jvms.15-0002), 2015-05-18
Supplement: jvms-77-1319-s001.pdf [file jvms-77-1319-s001.pdf]

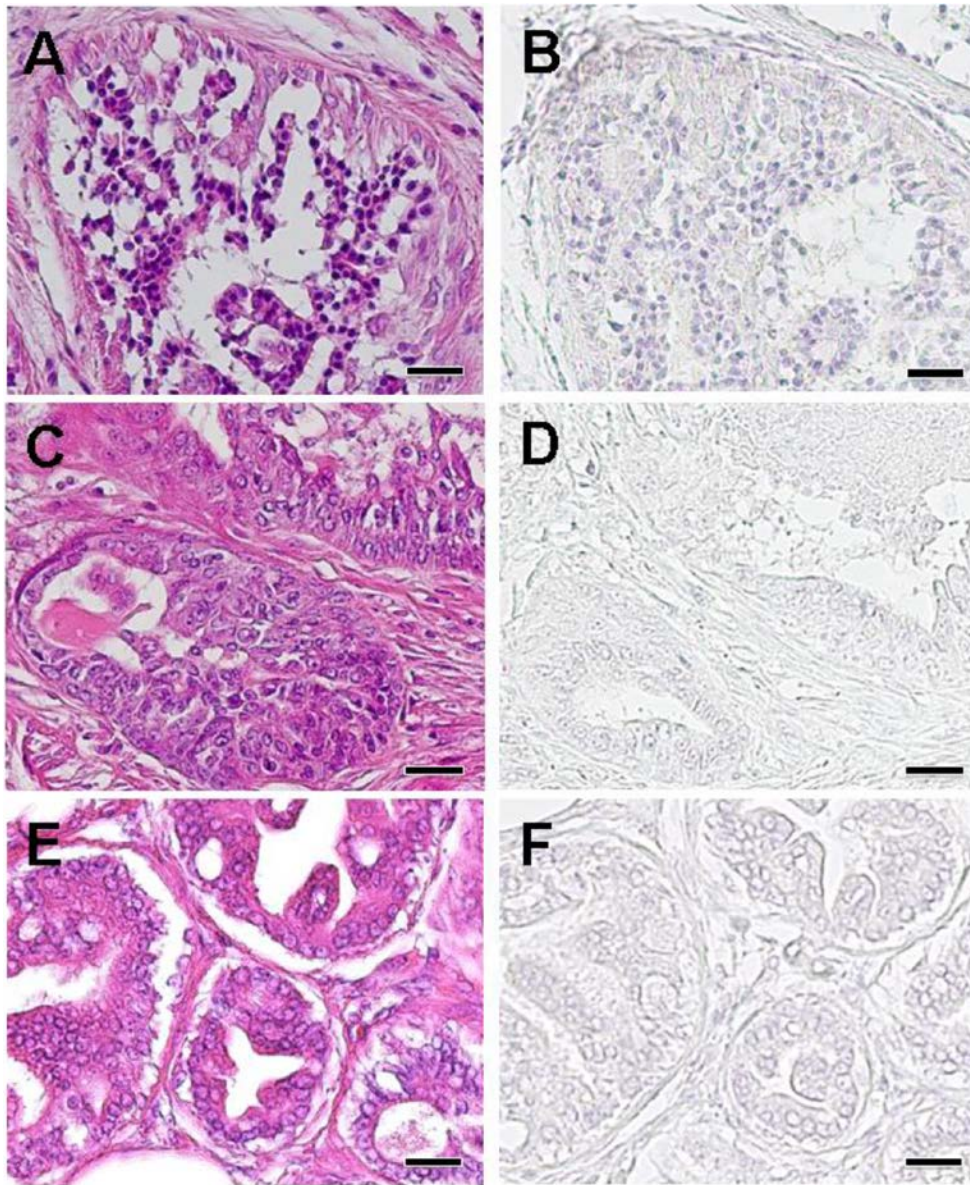

**Supplemental Fig. 1. Histological and immunohistochemical images of the malignant tumor samples used for Western blotting.**

Hematoxylin-Eosin stain (A, C and E) and SSTR2 immunoreactivity (B, D and F) in three malignant tumor samples used for Western blotting. The left one of the malignant tumor samples in Fig. 2A corresponds to A and B in this figure. The middle one corresponds to C and D, and the right one corresponds to E and F. Scale bars indicate 25  $\mu\text{m}$ .
